# Supplementary material for: Genomic and Secretomic Analyses Reveal Unique Features of the Lignocellulolytic Enzyme System of Penicillium decumbens
Source: PubMed Central journal article supplement (PMC3562324; doi:10.1371/journal.pone.0055185), 2013-02-01

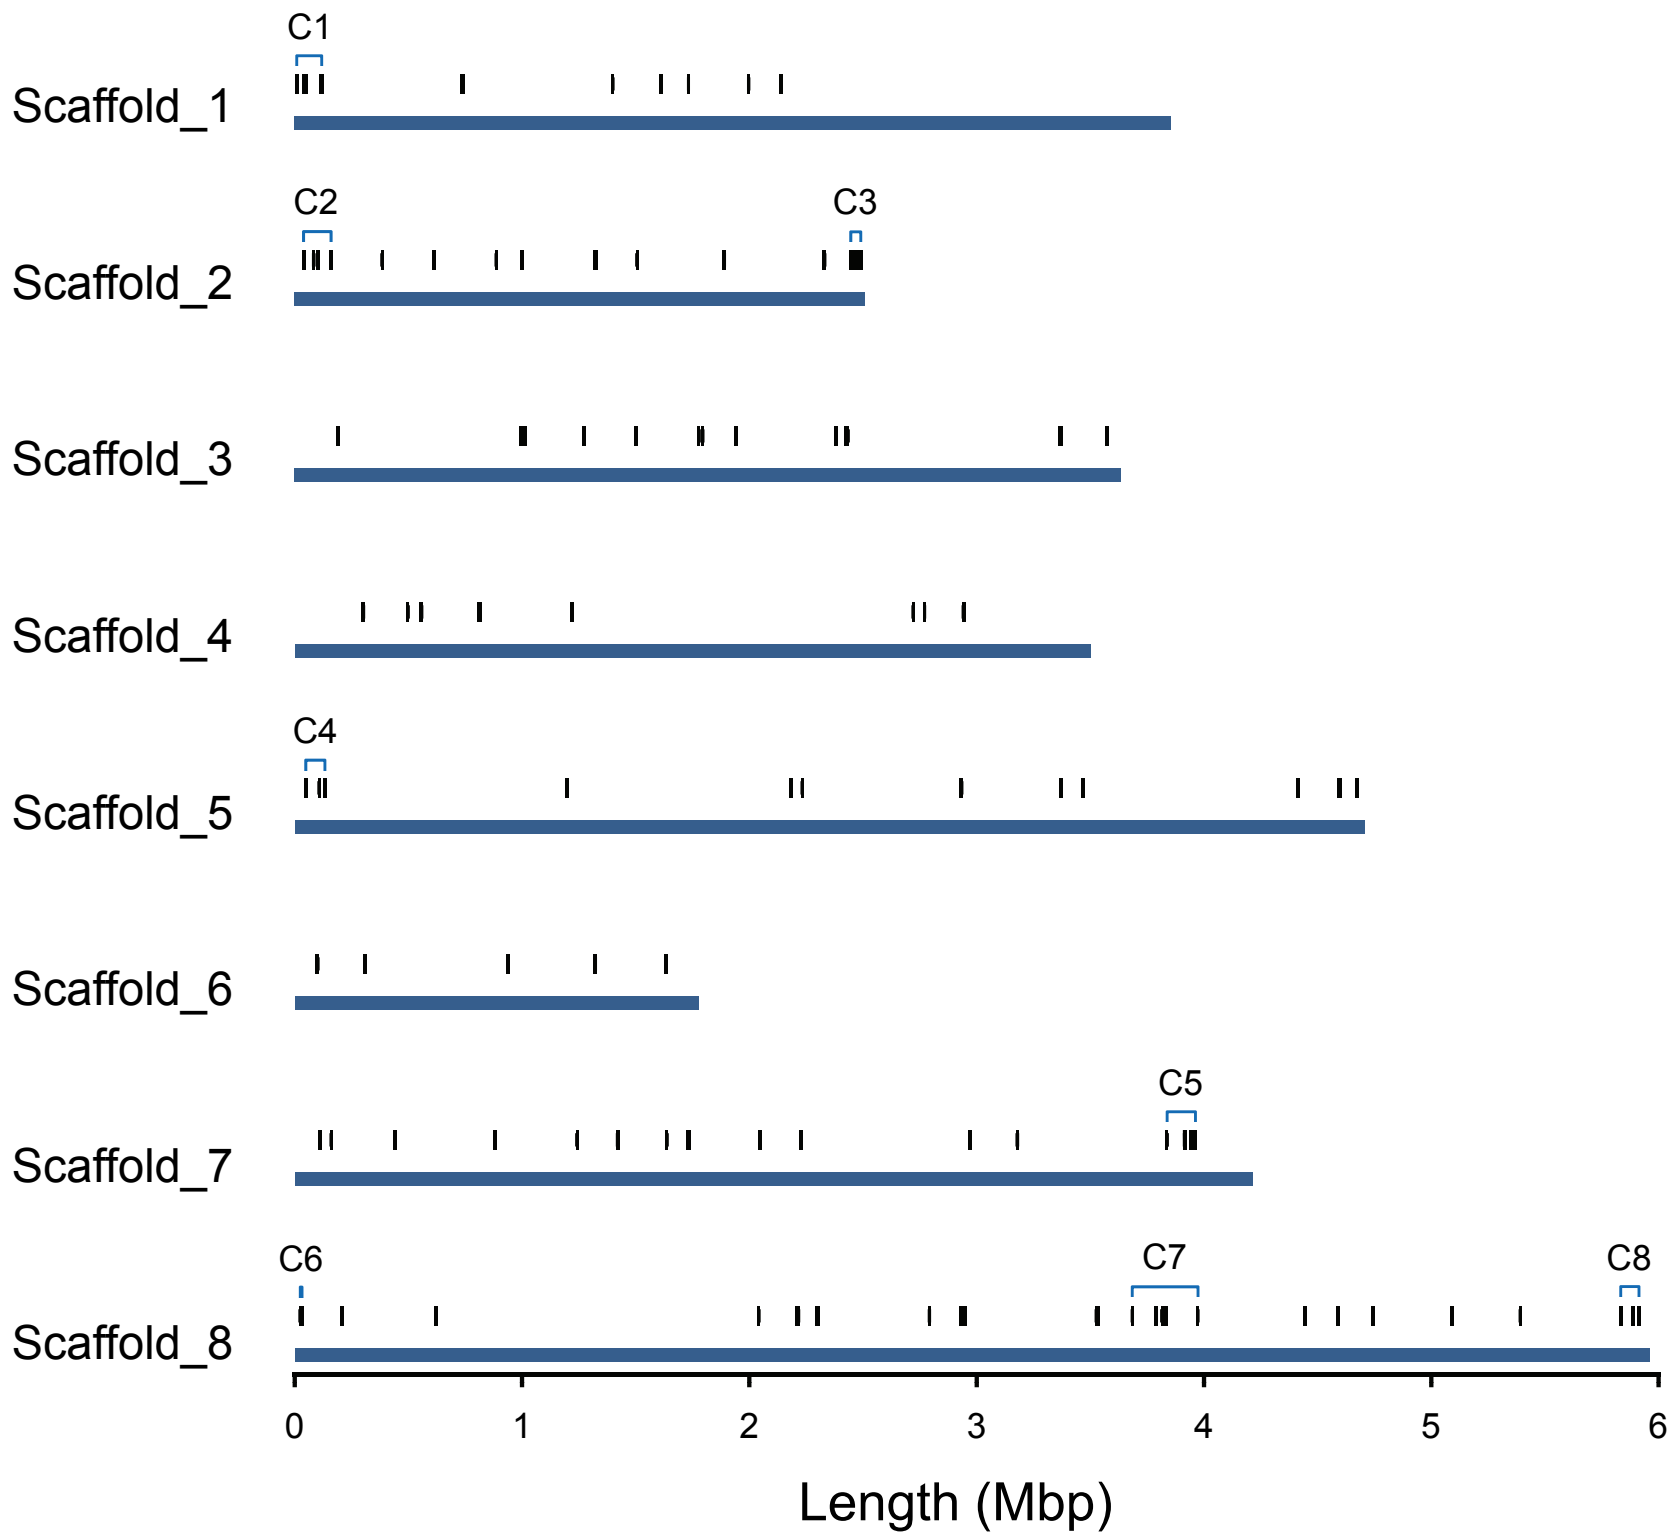

Supplement: pone.0055185.s003.pdf [file pone.0055185.s003.pdf]
