# Supplementary material for: Genomic and Secretomic Analyses Reveal Unique Features of the Lignocellulolytic Enzyme System of Penicillium decumbens
Source: PLoS One. 2013 Feb 1;8(2):e55185. doi: 10.1371/journal.pone.0055185 (PMC3562324; doi:10.1371/journal.pone.0055185)
Supplement: Table S7 — Comparison of number of proteins in level_3 Gene Ontology terms among seven fungal species. (XLS) [file pone.0055185.s011.xls]

## Sheet: Sheet1
Table S7. Comparison of number of proteins in level_3 Gene Ontology terms among seven fungal species.
Type	Accession	Function	S. cerevisiae	N. crassa	T. reesei	P. decumbens	P. chrysogenum	A. niger	A. nidulans
biological_process	GO: 0044238	primary metabolic process	1810	2431	2396	2496	3032	3047	2778
biological_process	GO: 0044237	cellular metabolic process	1818	2337	2228	2395	2931	3035	2638
biological_process	GO: 0043170	macromolecule metabolic process	1321	1720	1713	1811	2172	2148	1952
biological_process	GO: 0006807	nitrogen compound metabolic process	1017	1346	1352	1404	1758	1772	1605
biological_process	GO: 0009058	biosynthetic process	947	1142	1188	1248	1517	1552	1388
biological_process	GO: 0051234	establishment of localization	560	779	847	859	1073	1123	1060
biological_process	GO: 0006810	transport	542	725	810	825	1034	1087	1025
biological_process	GO: 0044281	small molecule metabolic process	534	762	650	720	894	1042	863
biological_process	GO: 0050789	regulation of biological process	418	627	674	707	932	853	761
biological_process	GO: 0050794	regulation of cellular process	405	582	643	676	901	811	725
biological_process	GO: 0055114	oxidation-reduction process	239	477	597	547	786	953	840
biological_process	GO: 0019222	regulation of metabolic process	278	407	457	493	678	607	549
biological_process	GO: 0055085	transmembrane transport	241	360	451	457	649	707	642
biological_process	GO: 0009056	catabolic process	247	392	307	391	425	498	438
biological_process	GO: 0051716	cellular response to stimulus	220	319	292	315	333	319	297
biological_process	GO: 0071841	cellular component organization or biogenesis at cellular level	180	326	249	256	285	283	265
biological_process	GO: 0016043	cellular component organization	148	292	231	249	273	298	262
biological_process	GO: 0006950	response to stress	147	193	186	200	217	227	190
biological_process	GO: 0007165	signal transduction	125	184	179	190	210	191	184
biological_process	GO: 0033036	macromolecule localization	152	164	163	154	132	143	153
biological_process	GO: 0051641	cellular localization	140	143	147	142	124	124	136
biological_process	GO: 0044085	cellular component biogenesis	111	158	134	131	144	142	141
biological_process	GO: 0051649	establishment of localization in cell	137	130	143	131	115	114	128
biological_process	GO: 0045184	establishment of protein localization	133	119	133	122	103	103	122
biological_process	GO: 0042221	response to chemical stimulus	25	101	90	93	122	122	94
biological_process	GO: 0007049	cell cycle	61	100	84	89	101	86	79
biological_process	GO: 0048856	anatomical structure development	17	100	76	83	110	89	78
biological_process	GO: 0016192	vesicle-mediated transport	66	75	75	75	72	68	75
biological_process	GO: 0065008	regulation of biological quality	42	69	65	75	86	92	79
biological_process	GO: 0007275	multicellular organismal development	15	101	85	74	99	91	85
biological_process	GO: 0065009	regulation of molecular function	33	56	55	62	60	50	55
biological_process	GO: 0048583	regulation of response to stimulus	39	48	58	56	59	58	55
biological_process	GO: 0022402	cell cycle process	34	69	54	55	64	60	52
biological_process	GO: 0019637	organophosphate metabolic process	43	53	47	47	48	59	47
biological_process	GO: 0023051	regulation of signaling	41	43	49	47	51	50	49
biological_process	GO: 0048519	negative regulation of biological process	21	56	48	47	67	53	49
biological_process	GO: 0008219	cell death	7	37	49	40	47	47	49
biological_process	GO: 0048518	positive regulation of biological process	15	31	32	39	43	40	33
biological_process	GO: 0048869	cellular developmental process	10	51	29	36	47	32	33
biological_process	GO: 0019725	cellular homeostasis	30	35	28	35	39	37	33
biological_process	GO: 0048523	negative regulation of cellular process	19	44	41	34	55	38	37
biological_process	GO: 0009653	anatomical structure morphogenesis	9	52	29	32	36	40	35
biological_process	GO: 0007017	microtubule-based process	17	40	30	31	32	33	38
biological_process	GO: 0048522	positive regulation of cellular process	12	25	24	31	31	30	23
biological_process	GO: 0007154	cell communication	20	27	35	30	32	36	34
biological_process	GO: 0009892	negative regulation of metabolic process	17	28	22	22	24	23	21
biological_process	GO: 0022414	reproductive process	10	27	23	21	36	28	19
biological_process	GO: 0009605	response to external stimulus	2	14	12	20	15	17	16
biological_process	GO: 0016044	cellular membrane organization	12	19	16	20	17	15	17
biological_process	GO: 0019748	secondary metabolic process	0	15	10	19	17	19	29
biological_process	GO: 0071554	cell wall organization or biogenesis	5	16	15	19	21	21	33
biological_process	GO: 0006413	translational initiation	14	24	18	18	18	20	20
biological_process	GO: 0009628	response to abiotic stimulus	3	14	15	17	22	15	16
biological_process	GO: 0030029	actin filament-based process	12	20	17	15	16	17	18
biological_process	GO: 0003006	developmental process involved in reproduction	3	15	15	14	22	16	12
biological_process	GO: 0003008	system process	1	9	17	14	13	23	14
biological_process	GO: 0071103	DNA conformation change	18	22	18	14	16	18	18
biological_process	GO: 0002682	regulation of immune system process	2	12	12	13	14	15	11
biological_process	GO: 0009790	embryo development	4	24	14	13	20	22	16
biological_process	GO: 0009893	positive regulation of metabolic process	11	12	9	13	15	13	12
biological_process	GO: 0048646	anatomical structure formation involved in morphogenesis	5	19	12	13	16	15	13
biological_process	GO: 0051128	regulation of cellular component organization	11	17	15	13	18	20	18
biological_process	GO: 0051236	establishment of RNA localization	8	16	13	13	10	13	13
biological_process	GO: 0016458	gene silencing	7	14	11	12	13	12	14
biological_process	GO: 0032940	secretion by cell	12	13	13	12	13	10	12
biological_process	GO: 0042440	pigment metabolic process	9	14	8	12	12	11	14
biological_process	GO: 0009607	response to biotic stimulus	0	12	10	11	12	16	12
biological_process	GO: 0019953	sexual reproduction	5	11	3	11	10	9	5
biological_process	GO: 0009719	response to endogenous stimulus	1	13	11	10	11	13	11
biological_process	GO: 0051239	regulation of multicellular organismal process	2	4	4	10	10	11	5
biological_process	GO: 0051707	response to other organism	0	12	9	10	11	16	12
biological_process	GO: 0032504	multicellular organism reproduction	2	5	2	9	9	9	4
biological_process	GO: 0032879	regulation of localization	4	8	4	9	5	3	5
biological_process	GO: 0048609	multicellular organismal reproductive process	2	5	2	9	9	9	4
biological_process	GO: 0006955	immune response	1	5	8	8	8	6	9
biological_process	GO: 0007610	behavior	2	6	4	8	2	8	4
biological_process	GO: 0022406	membrane docking	8	8	8	8	8	8	9
biological_process	GO: 0002684	positive regulation of immune system process	2	4	5	7	6	3	4
biological_process	GO: 0007267	cell-cell signaling	1	7	8	7	9	12	10
biological_process	GO: 0009791	post-embryonic development	2	10	9	7	18	11	11
biological_process	GO: 0042330	taxis	0	7	4	7	7	8	7
biological_process	GO: 0048584	positive regulation of response to stimulus	0	3	7	7	11	7	6
biological_process	GO: 0002252	immune effector process	0	8	4	6	6	10	4
biological_process	GO: 0006928	cellular component movement	1	5	7	6	7	6	4
biological_process	GO: 0044419	interspecies interaction between organisms	1	13	11	6	17	14	9
biological_process	GO: 0048870	cell motility	1	5	6	6	7	6	4
biological_process	GO: 0051674	localization of cell	1	5	6	6	7	6	4
biological_process	GO: 0071804	cellular potassium ion transport	3	4	2	6	2	7	0
biological_process	GO: 0001816	cytokine production	0	1	1	5	2	5	2
biological_process	GO: 0002520	immune system development	2	5	7	5	5	4	6
biological_process	GO: 0007059	chromosome segregation	4	12	7	5	6	5	6
biological_process	GO: 0007155	cell adhesion	0	6	9	5	9	7	7
biological_process	GO: 0007389	pattern specification process	0	8	5	5	4	3	5
biological_process	GO: 0035637	multicellular organismal signaling	1	0	4	5	7	10	8
biological_process	GO: 0043900	regulation of multi-organism process	0	5	3	5	5	6	5
biological_process	GO: 0048610	cellular process involved in reproduction	6	7	3	5	4	2	2
biological_process	GO: 0002253	activation of immune response	0	3	4	4	5	2	4
biological_process	GO: 0042445	hormone metabolic process	0	3	1	4	5	5	7
biological_process	GO: 0044087	regulation of cellular component biogenesis	3	5	3	4	4	4	5
biological_process	GO: 0051235	maintenance of location	1	4	2	4	3	2	4
biological_process	GO: 0051656	establishment of organelle localization	2	7	4	4	3	2	3
biological_process	GO: 0001775	cell activation	2	1	4	3	2	3	1
biological_process	GO: 0009405	pathogenesis	0	0	3	3	0	0	1
biological_process	GO: 0016049	cell growth	0	4	4	3	7	7	4
biological_process	GO: 0023056	positive regulation of signaling	0	0	3	3	6	2	2
biological_process	GO: 0034330	cell junction organization	0	4	1	3	3	3	3
biological_process	GO: 0051241	negative regulation of multicellular organismal process	0	1	0	3	1	1	1
biological_process	GO: 0051301	cell division	2	2	4	3	6	6	5
biological_process	GO: 0051651	maintenance of location in cell	1	4	2	3	3	2	4
biological_process	GO: 0002200	somatic diversification of immune receptors	1	2	2	2	2	1	2
biological_process	GO: 0002440	production of molecular mediator of immune response	0	1	0	2	1	1	1
biological_process	GO: 0006903	vesicle targeting	1	2	1	2	1	1	2
biological_process	GO: 0007568	aging	0	1	4	2	3	4	3
biological_process	GO: 0022602	ovulation cycle process	0	0	0	2	2	2	0
biological_process	GO: 0031640	killing of cells of other organism	0	2	0	2	6	3	1
biological_process	GO: 0033059	cellular pigmentation	0	1	1	2	1	1	1
biological_process	GO: 0042127	regulation of cell proliferation	1	3	7	2	1	4	2
biological_process	GO: 0042698	ovulation cycle	0	0	0	2	2	2	0
biological_process	GO: 0048589	developmental growth	0	2	1	2	3	1	1
biological_process	GO: 0050793	regulation of developmental process	3	5	4	2	16	4	4
biological_process	GO: 0051129	negative regulation of cellular component organization	0	4	3	2	3	3	3
biological_process	GO: 0051130	positive regulation of cellular component organization	3	4	4	2	2	3	2
biological_process	GO: 0051606	detection of stimulus	0	2	3	2	3	1	2
biological_process	GO: 0000746	conjugation	3	3	1	1	1	1	1
biological_process	GO: 0000910	cytokinesis	1	0	1	1	2	2	2
biological_process	GO: 0001763	morphogenesis of a branching structure	0	1	0	1	0	1	0
biological_process	GO: 0002683	negative regulation of immune system process	0	0	1	1	0	1	0
biological_process	GO: 0003001	generation of a signal involved in cell-cell signaling	1	3	2	1	2	0	2
biological_process	GO: 0006808	regulation of nitrogen utilization	0	3	0	1	1	3	1
biological_process	GO: 0007163	establishment or maintenance of cell polarity	0	0	0	1	2	0	0
biological_process	GO: 0007585	respiratory gaseous exchange	0	2	1	1	2	2	1
biological_process	GO: 0008037	cell recognition	0	1	0	1	0	1	0
biological_process	GO: 0008284	positive regulation of cell proliferation	0	1	3	1	0	0	2
biological_process	GO: 0008285	negative regulation of cell proliferation	0	1	3	1	1	2	0
biological_process	GO: 0009566	fertilization	0	3	0	1	1	0	0
biological_process	GO: 0009606	tropism	0	1	0	1	0	0	1
biological_process	GO: 0019098	reproductive behavior	1	1	1	1	0	2	0
biological_process	GO: 0019882	antigen processing and presentation	1	1	0	1	1	0	1
biological_process	GO: 0022415	viral reproductive process	2	2	1	1	3	0	0
biological_process	GO: 0023057	negative regulation of signaling	1	1	1	1	1	2	4
biological_process	GO: 0023061	signal release	1	3	2	1	2	0	2
biological_process	GO: 0030534	adult behavior	0	0	1	1	0	1	1
biological_process	GO: 0032506	cytokinetic process	0	0	0	1	1	1	1
biological_process	GO: 0032844	regulation of homeostatic process	1	0	0	1	1	0	0
biological_process	GO: 0040008	regulation of growth	1	5	3	1	5	2	0
biological_process	GO: 0048585	negative regulation of response to stimulus	1	1	1	1	1	2	4
biological_process	GO: 0048871	multicellular organismal homeostasis	0	1	1	1	1	1	1
biological_process	GO: 0050878	regulation of body fluid levels	0	1	1	1	3	6	1
biological_process	GO: 0051051	negative regulation of transport	0	3	0	1	1	1	0
biological_process	GO: 0051094	positive regulation of developmental process	1	0	0	1	2	0	0
biological_process	GO: 0051240	positive regulation of multicellular organismal process	0	0	0	1	0	1	1
biological_process	GO: 0051705	behavioral interaction between organisms	0	1	1	1	0	2	1
biological_process	GO: 0000128	flocculation	4	0	0	0	0	0	0
biological_process	GO: 0007618	mating	2	0	1	0	0	0	0
biological_process	GO: 0007623	circadian rhythm	0	0	1	0	2	0	0
biological_process	GO: 0010073	meristem maintenance	1	0	0	0	8	0	0
biological_process	GO: 0019827	stem cell maintenance	1	1	0	0	7	0	0
biological_process	GO: 0030447	filamentous growth	0	1	2	0	0	0	0
biological_process	GO: 0032196	transposition	0	0	1	0	3	3	1
biological_process	GO: 0035264	multicellular organism growth	1	1	1	0	0	1	1
biological_process	GO: 0045926	negative regulation of growth	0	2	0	0	1	0	0
biological_process	GO: 0048066	developmental pigmentation	0	1	1	0	1	1	1
biological_process	GO: 0048524	positive regulation of viral reproduction	1	0	1	0	1	0	0
biological_process	GO: 0050792	regulation of viral reproduction	1	0	1	0	1	0	0
biological_process	GO: 0051093	negative regulation of developmental process	1	3	1	0	9	0	1
biological_process	GO: 0052192	movement in environment of other organism involved in symbiotic interaction	0	0	1	0	0	1	1
biological_process	GO: 2000241	regulation of reproductive process	1	0	1	0	1	0	0
cellular_component	GO: 0044464	cell part	2199	3127	2982	3149	3835	3831	3516
cellular_component	GO: 0005622	intracellular	1665	2345	2135	2232	2625	2565	2384
cellular_component	GO: 0044424	intracellular part	1487	2139	1922	2031	2391	2366	2190
cellular_component	GO: 0043229	intracellular organelle	1094	1655	1528	1573	1862	1847	1718
cellular_component	GO: 0043227	membrane-bounded organelle	851	1397	1293	1337	1595	1587	1470
cellular_component	GO: 0016020	membrane	789	1043	1110	1206	1495	1506	1386
cellular_component	GO: 0044425	membrane part	544	721	744	835	1081	1142	992
cellular_component	GO: 0044422	organelle part	445	727	576	594	636	628	601
cellular_component	GO: 0044446	intracellular organelle part	406	653	533	540	582	561	545
cellular_component	GO: 0043228	non-membrane-bounded organelle	298	391	302	307	339	336	314
cellular_component	GO: 0043234	protein complex	271	325	266	289	292	293	296
cellular_component	GO: 0031090	organelle membrane	184	267	212	229	236	234	226
cellular_component	GO: 0030529	ribonucleoprotein complex	219	243	207	222	213	211	223
cellular_component	GO: 0031975	envelope	133	164	129	141	144	129	139
cellular_component	GO: 0043233	organelle lumen	79	171	139	139	153	147	139
cellular_component	GO: 0012505	endomembrane system	76	100	88	98	99	92	95
cellular_component	GO: 0071944	cell periphery	30	65	59	68	81	77	61
cellular_component	GO: 0031982	vesicle	20	37	32	39	43	42	38
cellular_component	GO: 0030312	external encapsulating structure	13	24	23	23	25	29	27
cellular_component	GO: 0000267	cell fraction	4	20	14	20	20	23	20
cellular_component	GO: 0042995	cell projection	0	6	6	15	14	12	14
cellular_component	GO: 0044421	extracellular region part	4	15	11	9	14	17	4
cellular_component	GO: 0032993	protein-DNA complex	12	15	12	8	10	14	11
cellular_component	GO: 0044462	external encapsulating structure part	0	6	6	7	7	6	10
cellular_component	GO: 0008287	protein serine/threonine phosphatase complex	7	7	6	6	5	5	6
cellular_component	GO: 0031970	organelle envelope lumen	6	5	5	5	5	4	5
cellular_component	GO: 0044297	cell body	0	2	2	4	3	3	3
cellular_component	GO: 0042597	periplasmic space	0	4	5	3	5	3	8
cellular_component	GO: 0019028	viral capsid	0	2	1	2	4	2	4
cellular_component	GO: 0031012	extracellular matrix	2	3	3	2	3	5	3
cellular_component	GO: 0031252	cell leading edge	0	1	1	2	2	2	2
cellular_component	GO: 0044420	extracellular matrix part	1	1	1	2	2	2	0
cellular_component	GO: 0044423	virion part	0	2	1	2	5	2	4
cellular_component	GO: 0000313	organellar ribosome	2	1	1	1	1	1	1
cellular_component	GO: 0005933	cellular bud	4	1	1	1	1	1	1
cellular_component	GO: 0009349	riboflavin synthase complex	1	1	1	1	1	1	1
cellular_component	GO: 0009986	cell surface	0	0	0	1	1	1	1
cellular_component	GO: 0019008	molybdopterin synthase complex	0	1	1	1	1	1	1
cellular_component	GO: 0043245	extraorganismal space	1	3	2	1	6	2	0
cellular_component	GO: 0044217	other organism part	1	3	2	1	6	2	0
cellular_component	GO: 0044449	contractile fiber part	0	1	0	1	3	1	3
cellular_component	GO: 0044463	cell projection part	0	0	0	1	0	0	2
cellular_component	GO: 0005615	extracellular space	0	0	3	0	1	4	0
molecular_function	GO: 0016787	hydrolase activity	725	1104	1132	1149	1303	1522	1315
molecular_function	GO: 0043167	ion binding	617	1061	1152	1148	1585	1622	1415
molecular_function	GO: 0000166	nucleotide binding	759	935	912	902	1092	1084	982
molecular_function	GO: 0005515	protein binding	695	955	930	888	1070	1046	951
molecular_function	GO: 0003676	nucleic acid binding	774	900	826	876	1139	1078	974
molecular_function	GO: 0016740	transferase activity	571	766	805	856	1006	1119	930
molecular_function	GO: 0016491	oxidoreductase activity	287	628	778	753	1083	1336	1157
molecular_function	GO: 0022892	substrate-specific transporter activity	215	260	288	331	429	443	403
molecular_function	GO: 0048037	cofactor binding	155	272	314	325	441	529	447
molecular_function	GO: 0022857	transmembrane transporter activity	208	250	269	316	423	432	392
molecular_function	GO: 0003700	sequence-specific DNA binding transcription factor activity	121	173	268	281	449	404	329
molecular_function	GO: 0016874	ligase activity	116	167	170	197	207	240	196
molecular_function	GO: 0016829	lyase activity	69	123	134	142	183	227	167
molecular_function	GO: 0003735	structural constituent of ribosome	181	149	129	130	126	129	128
molecular_function	GO: 0019842	vitamin binding	65	98	108	128	147	179	146
molecular_function	GO: 0046906	tetrapyrrole binding	30	89	117	112	152	206	169
molecular_function	GO: 0016853	isomerase activity	63	74	66	74	85	107	81
molecular_function	GO: 0030246	carbohydrate binding	13	62	49	65	50	52	62
molecular_function	GO: 0004871	signal transducer activity	24	57	45	64	62	67	71
molecular_function	GO: 0031406	carboxylic acid binding	20	32	40	55	61	78	66
molecular_function	GO: 0051540	metal cluster binding	26	47	44	48	53	56	53
molecular_function	GO: 0060589	nucleoside-triphosphatase regulator activity	44	50	48	48	46	50	50
molecular_function	GO: 0043176	amine binding	18	24	31	44	48	66	57
molecular_function	GO: 0001871	pattern binding	2	32	24	35	18	21	23
molecular_function	GO: 0008289	lipid binding	20	31	26	29	29	28	30
molecular_function	GO: 0008047	enzyme activator activity	27	29	28	27	25	27	27
molecular_function	GO: 0004601	peroxidase activity	6	12	19	12	16	22	16
molecular_function	GO: 0004857	enzyme inhibitor activity	4	7	9	9	8	6	6
molecular_function	GO: 0000989	transcription factor binding transcription factor activity	1	6	4	7	6	3	8
molecular_function	GO: 0019207	kinase regulator activity	4	6	5	7	9	9	5
molecular_function	GO: 0019239	deaminase activity	8	10	12	7	13	11	11
molecular_function	GO: 0001882	nucleoside binding	5	5	4	5	5	5	3
molecular_function	GO: 0009975	cyclase activity	4	6	4	5	5	6	4
molecular_function	GO: 0019208	phosphatase regulator activity	5	7	6	5	5	5	6
molecular_function	GO: 0043021	ribonucleoprotein binding	3	5	6	5	4	6	6
molecular_function	GO: 0005199	structural constituent of cell wall	10	2	1	4	7	6	5
molecular_function	GO: 0008641	small protein activating enzyme activity	3	4	4	4	4	4	4
molecular_function	GO: 0061134	peptidase regulator activity	1	3	6	4	4	2	2
molecular_function	GO: 0003682	chromatin binding	3	3	2	3	2	4	3
molecular_function	GO: 0004784	superoxide dismutase activity	3	3	3	3	3	3	3
molecular_function	GO: 0019825	oxygen binding	3	3	3	3	4	6	3
molecular_function	GO: 0042277	peptide binding	3	3	4	3	3	2	3
molecular_function	GO: 0000150	recombinase activity	0	1	1	2	2	0	0
molecular_function	GO: 0045735	nutrient reservoir activity	0	1	4	2	3	4	5
molecular_function	GO: 0070283	radical SAM enzyme activity	2	2	2	2	2	2	2
molecular_function	GO: 0004133	glycogen debranching enzyme activity	1	1	1	1	1	1	1
molecular_function	GO: 0004362	glutathione-disulfide reductase activity	1	1	1	1	1	1	1
molecular_function	GO: 0004791	thioredoxin-disulfide reductase activity	2	1	1	1	1	1	1
molecular_function	GO: 0008430	selenium binding	0	1	1	1	1	1	1
molecular_function	GO: 0016531	copper chaperone activity	1	2	1	1	1	1	1
molecular_function	GO: 0017056	structural constituent of nuclear pore	1	1	1	1	1	1	1
molecular_function	GO: 0030337	DNA polymerase processivity factor activity	1	1	1	1	1	1	1
molecular_function	GO: 0030371	translation repressor activity	1	1	0	1	6	1	1
molecular_function	GO: 0032451	demethylase activity	0	2	0	1	2	1	0
molecular_function	GO: 0042165	neurotransmitter binding	1	0	1	1	0	0	0
molecular_function	GO: 0042927	siderophore transporter activity	0	0	0	1	1	2	0
molecular_function	GO: 0042979	ornithine decarboxylase regulator activity	0	1	1	1	1	1	1
molecular_function	GO: 0043515	kinetochore binding	0	1	1	1	1	1	1
molecular_function	GO: 0060090	binding, bridging	1	2	2	1	1	2	1
molecular_function	GO: 0004803	transposase activity	0	0	1	0	3	3	1
molecular_function	GO: 0008144	drug binding	1	1	1	0	0	0	0
