# Supplementary material for: Genomic and Secretomic Analyses Reveal Unique Features of the Lignocellulolytic Enzyme System of Penicillium decumbens
Source: PLoS One. 2013 Feb 1;8(2):e55185. doi: 10.1371/journal.pone.0055185 (PMC3562324; doi:10.1371/journal.pone.0055185)
Supplement: Table S10 — List of plant cell wall degrading-enzymes in five fungal species. (XLS) [file pone.0055185.s014.xls]

## Sheet: Sheet1
Table S10. List of plant cell wall degrading-enzymes in five fungal species.
Enzyme	CAZy Family	P. decumbens	T. reesei	P. chrysogenum	A. niger	A. oryzae
1. Cellulolytic enzymes
Cellobiohydrolase	GH7	PDE_05445	123989	XP_002562376.1	XP_001389576.1	AO090001000348
		PDE_07945		XP_002562756.1	XP_001392008.1	AO090012000941
	GH6	PDE_07124	72567	XP_002560902.1	XP_001392295.1	AO090038000439
					XP_001395308.1
Endo-β-1,4-glucanase	GH7	PDE_07929	122081	-	-	AO090010000314
	GH5	PDE_00507	53731	XP_002557514.1	XP_001389577.1	AO090003001342
		PDE_09969	82616	XP_002562435.1	XP_001391969.1	AO090005000423
		PDE_05193	120312	XP_002562753.1	XP_001397982.1	AO090005001553
		PDE_03711		XP_002565826.1		AO090011000715
		PDE_09226		XP_002568455.1
		PDE_09267
	GH12	PDE_02886	77284	XP_002560942.1	XP_001390433.1	AO090003000905
		PDE_06439	123232	XP_002561188.1	XP_001388766.1	AO090026000102
		PDE_09014		XP_002563257.1	XP_001390419.1	AO090038000175
					XP_001400902.1	AO090701000185
	GH45	PDE_07928	49976	-	-	-
Cellulose monooxygenase	GH61	PDE_05633	27554	XP_002558168.1	XP_001402213.1	AO090012000090
		PDE_00698	73643	XP_002559170.1	XP_001392640.1	AO090001000221
		PDE_01261	120961	XP_002559725.1	XP_001395335.1	AO090023000787
		PDE_06768		XP_002563599.1	XP_001395530.1	AO090138000004
					XP_001400893.1	AO090005000531
					XP_001396992.1	AO090103000087
					XP_001397023.1	AO090023000056
						AO090023000159
2. β-glucosidases
β-glucosidase	GH1	PDE_04859	120749	XP_002558153.1	XP_001394213.1	AO090003000497
		PDE_09535	22197	XP_002559338.1	XP_001401684.1	AO090120000075
		PDE_01277		XP_002561682.1	XP_001390255.1	AO090113000148
		PDE_00579
	GH3	PDE_01565	46816	XP_002557246.1	XP_001391838.1	AO090001000266
		PDE_02108	76672	XP_002557931.1	XP_001397014.1	AO090001000544
		PDE_02736	104797	XP_002560677.1	XP_001390414.1	AO090003001511
		PDE_02905	82227	XP_002561135.1	XP_001391025.1	AO090005000337
		PDE_03485	66832	XP_002562038.1	XP_001392050.1	AO090009000356
		PDE_04251	121735	XP_002563511.1	XP_001392938.1	AO090009000554
		PDE_09019	76227	XP_002563832.1	XP_001394024.1	AO090010000034
			47268	XP_002564856.1	XP_001394593.1	AO090012000135
				XP_002565451.1	XP_001400803.1	AO090026000123
				XP_002566312.1	XP_001396728.1	AO090038000223
				XP_002568350.1	XP_001398281.1	AO090038000425
				XP_002568817.1	XP_001398816.1	AO090103000127
						AO090166000048
						AO090166000090
						AO090701000244
						AO090701000841
3. Hemicellulases
Endo-β-1,4-xylanase	GH10	PDE_02418	120229	XP_002563227.1	XP_001389996.1	AO090103000326
		PDE_00752		XP_002561473.1		AO090103000423
		PDE_08094		XP_002564127.1		AO090701000887
						AO090001000208
	GH11	PDE_05210	74223	XP_002557047.1	XP_001401361.1	AO090001000111
		PDE_09478	112392		XP_001388522.1	AO090120000026
		PDE_02101	123818		XP_001389848.1	AO090103000141
		PDE_02682			XP_001396990.1	AO090026000103
		PDE_04478
	GH30	PDE_03573	69276	-	-	-
		PDE_00014	111849
β-xylosidase/α-L-arabinofuranosidase	GH3	PDE_00049	121127	XP_002565392.1	XP_001389416.1	AO090005000986
		PDE_02413	58450	XP_002569321.1	XP_001398259.1	AO090011000140
		PDE_08037				AO090012000003
		PDE_09710				AO090103000120
						AO090701000274
	GH43	PDE_08972	68064	XP_002557032.1	XP_001396893.1	AO090103000268
		PDE_09995	3739	XP_002556679.1	XP_001394314.1	AO090138000055
		PDE_07585		XP_002557098.1	XP_001397586.1	AO090701000481
		PDE_06665		XP_002557900.1	XP_001399280.1	AO090005001320
		PDE_09811		XP_002558099.1	XP_001391576.1	AO090023000165
		PDE_06067		XP_002559986.1	XP_001399152.1	AO090005000476
		PDE_00015		XP_002562070.1	XP_001400184.1	AO090102000331
		PDE_01750		XP_002562974.1	XP_001393437.1	AO090701000838
		PDE_08036		XP_002564045.1		AO090010000029
		PDE_07334		XP_002568055.1		AO090005000064
		PDE_02165				AO090026000804
		PDE_06306				AO090003000239
						AO090701000886
	GH51	PDE_06546	-	XP_002556951.1	XP_001392290.1	AO090124000023
		PDE_07080		XP_002560907.1	XP_001388482.1	AO090012000298
		PDE_00276		XP_002559142.1	XP_001393408.1	AO090020000712
	GH54	PDE_09988	55319	XP_002565864.1	XP_001396769.1	AO090023000001
			123283
	GH62	PDE_00016	76210	XP_002563228.1	XP_001389998.1	AO090103000088
		PDE_07897				AO090701000885
β-1,4-mannanase	GH5	PDE_06023	56996	XP_002568421.1	XP_001390707.1	AO090038000444
				XP_002557624.1		AO090010000122
				XP_002567593.1
	GH26	PDE_06438	-	XP_002564703.1	XP_001397297.1	AO090011000055
β-mannosidase	GH2	PDE_05998	69245	XP_002561018.1	XP_001395271.1	AO090005000740
		PDE_08804	57857	XP_002568398.1	XP_001394632.1	AO090010000208
			59689			AO090001000556
			5836
			62166
Exo-α-L-1,5-arabinanase	GH93	PDE_09333	-	XP_002562032.1	-	AO090012000101
		PDE_08038		XP_002560442.1		AO090011000141
		PDE_04488				AO090003001017
Endo-β-1,4-galactanase	GH53	PDE_02583	-	XP_002558751.1	XP_001399045.1	AO090001000492
					XP_001397961.1
Xyloglucanase	GH74	-	49081	-	XP_001388626.1	-
α-galactosidase	GH27	PDE_02514	75015	XP_002568495.1	XP_001394616.1	AO090005000217
		PDE_03401	55999		XP_001388572.1	AO090003001305
			72632		XP_001390845.1	AO090023000151
			59391		XP_001400244.1
			65986		XP_001400806.1
			72704
			27259
			27219
	GH36	PDE_05594	124016	XP_002559223.1	XP_001401638.1	AO090011000063
			64827	XP_002569027.1	XP_001393350.1	AO090010000684
						AO090023000743
α-L-fucosidase	GH29	-	-	-	XP_001396349.1	-
	GH95	PDE_04858	58802	XP_002559337.1	XP_001397368.1	AO090009000086
			111138		XP_001397589.1	AO090005000512
			72488			AO090005000382
			5807
α-glucuronidase	GH67	PDE_03572	72526	XP_002557703.1	XP_001401203.1	AO090026000127
		PDE_07013		XP_002568813.1
Acetyl xylan esterase	CE1	PDE_09278	-	-	XP_001395572.1	AO090011000745
	CE2	PDE_01302	-	-	XP_001400833.1	-
	CE3	-	-	XP_002557104.1	XP_001392263.1	AO090012000636
				XP_002561787.1		AO090701000900
				XP_002563503.1		AO090020000508
				XP_002563760.1
	CE5	PDE_04182	73632	XP_002561538.1	XP_001393399.1	-
			44214		XP_001393418.1
			54219
	CE12	-	-	-	-	AO090102000092
Feruloyl esterase	CE1	PDE_08238	-	XP_002563600.1	XP_001395336.1	AO090023000158
		PDE_06649				AO090701000884
Glucuronoyl esterase	CE15	-	123940	XP_002559165.1	-	-
4. Pectinases
Polygalacturonase; rhamnogalacturonase	GH28	PDE_01896	103049	XP_002562374.1	XP_001389853.1	AO090001000133
		PDE_02689	122780	XP_002565929.1	XP_001399628.1	AO090003000524
		PDE_03218	112140	XP_002566187.1	XP_001397067.1	AO090005000067
		PDE_03466	70186	XP_002560493.1	XP_001389562.1	AO090005000186
		PDE_04162		XP_002563816.1	XP_001398000.1	AO090005001400
		PDE_04459			XP_001389855.1	AO090009000470
		PDE_05931			XP_001390812.1	AO090010000484
		PDE_06891			XP_001402326.1	AO090010000753
		PDE_07153			XP_001400373.1	AO090023000161
		PDE_07938			XP_001398939.1	AO090023000401
		PDE_09285			XP_001394399.1	AO090026000120
					XP_001395799.1	AO090026000252
					XP_001390549.1	AO090026000784
					XP_001390107.1	AO090038000552
					XP_001393642.1	AO090102000011
					XP_001394615.1	AO090102000139
					XP_001394831.1	AO090113000199
					XP_001395184.1	AO090124000009
					XP_001391028.1	AO090138000066
					XP_001391190.1	AO090138000067
					XP_001401044.1	AO090138000086
d-4,5 unsaturated β-glucuronyl hydrolase	GH88	PDE_02902	-	-	XP_001388574.1	AO090701000907
						AO090138000087
						AO090005000324
Unsaturated rhamnogalacturonyl hydrolase	GH105	PDE_01286	4221	XP_002558171.1	XP_001401157.1	AO090113000146
			57179	XP_002564218.1	XP_001400917.1	AO090001000063
						AO090003000153
						AO090001000174
Pectate lyase; pectin lyase	PL1	PDE_06068	-	XP_002559164.1	XP_001402478.1	AO090102000072
		PDE_07259		XP_002557828.1	XP_001394398.1	AO090011000030
		PDE_01467		XP_002566377.1	XP_001402523.1	AO090012000451
				XP_002568021.1	XP_001389926.1	AO090138000204
				XP_002562572.1	XP_001401061.1	AO090010000030
					XP_001397243.1	AO090010000087
						AO090010000504
						AO090103000463
						AO090012000121
						AO090003001295
						AO090701000321
						AO090011000673
	PL3	-	-	XP_002564620.1	-	AO090038000502
						AO090005000472
						AO090010000706
	PL9	-	-	-	-	AO090038000131
Rhamnogalacturonan lyase	PL4	PDE_01385	-	XP_002560032.1	XP_001400741.1	AO090011000349
		PDE_00004		XP_002568277.1	XP_001394043.1	AO090012000147+AO090012000148
		PDE_07659		XP_002569345.1		AO090113000057
						AO090138000119
	PL11	-	-	-	-	-
Pectin methylesterase	CE8	PDE_01675	-	XP_002563817.1	XP_001402325.1	AO090102000010
		PDE_01529		XP_002560396.1	XP_001390506.1	AO090003001514
		PDE_08805			XP_001400380.1	AO090012000749
		PDE_04459				AO090020000404
						AO090113000039
Pectin acetylesterase; rhamnogalacturonan acetylesterase	CE12	PDE_03289	-	XP_002559978.1	XP_001393530.1	AO090113000155
		PDE_02093		XP_002564033.1	XP_001402292.1	AO090701000556
						AO090003001268
5. Expansin-like proteins
Expansin-like protein		PDE_00610	110117	XP_002568006.1	XP_001390300.1	AO090010000490
		PDE_06125	104079	XP_002565679.1		AO090023000918
		PDE_09586	23115	XP_002565505.1		AO090701000717
		PDE_02102	71390
			123992
6. Plant cell wall degrading enzymes not assigned to CAZy families
Feruloyl esterase		PDE_08709	-	XP_002557661.1	XP_001393337.1	AO090001000207
		PDE_08770			XP_001396085.1	AO090103000242
		PDE_09178			XP_001396750.1	AO090102000013
					XP_001389907.1	AO090010000573
					XP_001396085.1	AO090001000066
					XP_001401646.1	AO090001000582
					XP_001393845.1
					XP_001395532.1
					XP_001392929.1
					XP_001397058.1
Tannase		PDE_02049	-	XP_002568734.1	XP_001401809.1	AO090010000320
		PDE_08772			XP_001399173.1	AO090103000074
					XP_001398312.1	AO090023000047
					XP_001394358.1
					XP_001389868.1
					XP_001393089.1
					XP_001390411.1
					XP_001396513.1
					XP_001402486.1
					XP_001393409.1
					XP_001388709.1
Cellobiose dehydrogenase		PDE_09177	-	XP_002563039.1	XP_001400060.1	AO090113000054
					XP_001402432.1
