# Supplementary material for: Genomic and Secretomic Analyses Reveal Unique Features of the Lignocellulolytic Enzyme System of Penicillium decumbens
Source: PLoS One. 2013 Feb 1;8(2):e55185. doi: 10.1371/journal.pone.0055185 (PMC3562324; doi:10.1371/journal.pone.0055185)
Supplement: Table S11 — List of CAZymes in genomic regions containing high density of plant cell wall degrading-enzymes in P. decumbens . (XLS) [file pone.0055185.s015.xls]

## Sheet: Sheet1
Table S11. List of CAZymes in genomic regions containing high density of plant cell wall degrading-enzymes in P. decumbens.
Cluster ID	Location	Start	End	Length (bp)	Number of all genes	Number of CAZymes	P valuea	CAZyme gene IDb	CAZy family	Function prediction
Enzymes in eight plant cell wall degrading-enzyme gene clusters
C1	Scaffold_1	9077	119483	110407	46	8	1.51013e-05	PDE_00004*	PL4	rhamnogalacturonan lyase
								PDE_00014*	GH30	endo-β-1,4-xylanase
								PDE_00015*	GH43	α-L-arabinofuranosidase
								PDE_00016*	GH62	α-L-arabinofuranosidase
								PDE_00036	GT4	GDP-Man: α-D-mannose-a-(1,6)-phosphatidyl myo-inositol monomannosyltransferase
								PDE_00043	CE4	chitooligosaccharide deacetylase
								PDE_00047	GT4	UDP-GlcNAc: phosphatidylinositol α-1,6-N-acetylglucosaminyltransferase
								PDE_00049*	GH3	β-xylosidase
C2	Scaffold_2	37745	158888	121144	42	7	0.00135518	PDE_01261*	GH61	endo-β-1,4-glucanase
								PDE_01264	GT90	UDP-Xyl: (mannosyl) glucuronoxylomannan/galactoxylomannan β-1,2-xylosyltransferase
								PDE_01277*	GH1	β-glucosidase
								PDE_01279	GH76	α-1,6-mannanase
								PDE_01280	GH2	exo-β-glucosaminidase
								PDE_01286*	GH105	unsaturated rhamnogalacturonyl hydrolase
								PDE_01302*	CE2	acetyl xylan esterase
C3	Scaffold_2	2447105	2490229	43125	16	5	0.000109856	PDE_02093*	CE12	rhamnogalacturonan acetylesterase
								PDE_02100	GH89	α-N-acetylglucosaminidase
								PDE_02101*	GH11	endo-β-1,4-xylanase
								PDE_02102*	CBM1	swollenin
								PDE_02108*	GH3	β-glucosidase
C4	Scaffold_5	48696	132584	83889	30	4	0.00178603	PDE_04459*	GH28;CE8	polygalacturonase and pectin methylesterase
								PDE_04468	GH76	α-1,6-mannanase
								PDE_04478*	GH11	endo-β-1,4-xylanase
								PDE_04488*	GH33	exo-α-L-1,5-arabinanase
C5	Scaffold_7	3835984	3961319	125336	49	5	0.00402748	PDE_07897*	GH62	α-L-arabinofuranosidase
								PDE_07928*	GH45	endo-β-1,4-glucanase
								PDE_07929*	GH7	endo-β-1,4-glucanase
								PDE_07938*	GH28	polygalacturonase
								PDE_07945*	GH7	cellobiohydrolase
C6	Scaffold_8	22922	31109	8188	3	3	3.1819e-13	PDE_08036*	GH43	β-xylosidase/α-L-arabinofuranosidase
								PDE_08037*	GH3	β-xylosidase
								PDE_08038*	GH93	exo-α-L-1,5-arabinanase
C7	Scaffold_8	3684061	3832957	148897	60	7	0.00125033	PDE_09226*	GH5	endo-β-1,4-glucanase
								PDE_09249	GH47	α-mannosidase
								PDE_09251	GT8	UDP-GlcNAc: N-acetylglucosaminyltransferase
								PDE_09267*	GH5	endo-β-1,4-glucanase
								PDE_09278*	CE1	acetyl xylan esterase
								PDE_09279	GH43	exo-β-1,3-galactanase
								PDE_09285*	GH28	rhamnogalacturonan α-L-rhamnopyranohydrolase
C8	Scaffold_8	5833185	5913993	80809	27	3	0.0155837	PDE_09969*	GH5	endo-β-1,4-glucanase
								PDE_09988*	GH54	α-L-arabinofuranosidase
								PDE_09995*	GH43	α-L-arabinofuranosidase
Additional adjacent plant cell wall-degrading enzyme genes
	Scaffold_4	809997	815998	6002	2	2	-	PDE_03572*	GH67	α-glucuronidase
								PDE_03573*	GH30	endo-β-1,4-xylanase
	Scaffold_5	1195344	1199821	4478	2	2	-	PDE_04858*	GH95	α-1,2-L-fucosidase
								PDE_04859*	GH1	β-glucosidase
	Scaffold_6	96598	101159	4562	2	2	-	PDE_06067*	GH43	α-L-arabinofuranosidase
								PDE_06068*	PL1	pectate lyase
	Scaffold_6	1317847	1322877	5031	2	2	-	PDE_06438*	GH26	β-1,4-mannanase
								PDE_06439*	GH12	endo-β-1,4-glucanase
	Scaffold_8	2295130	2301790	6661	2	2	-	PDE_08804*	GH2	β-mannosidase
								PDE_08805*	CE8	pectin methylesterase
	Scaffold_8	3525449	3532427	6979	2	0	-	PDE_09177*	-	cellobiose dehydrogenase
								PDE_09178*	-	feruloyl esterase
a Statistical analysis of distribution of CAZyme genes in the genome.
b Plant cell wall degrading-enzyme genes are indicated with asterisks. Adjacent plant cell wall-degrading enzyme genes are indicated in bold.
