# Supplementary material for: Genomic and Secretomic Analyses Reveal Unique Features of the Lignocellulolytic Enzyme System of Penicillium decumbens
Source: PLoS One. 2013 Feb 1;8(2):e55185. doi: 10.1371/journal.pone.0055185 (PMC3562324; doi:10.1371/journal.pone.0055185)
Supplement: Table S12 — Predicted secreted proteins in P. decumbens . (XLS) [file pone.0055185.s016.xls]

## Sheet: Sheet1
Table S12. Predicted secreted proteins in P. decumbens.
Protein ID	Function prediction
CAZymes
PDE_09278	acetyl xylan esterase, CE1, CBM1
PDE_01302	acetyl xylan esterase, CE2, CBM1
PDE_04182	acetyl xylan esterase, CE5
PDE_03849	acetylesterase active on various carbohydrate acetyl esters, CE16
PDE_05194	acetylesterase active on various carbohydrate acetyl esters, CE16
PDE_05342	acetylesterase active on various carbohydrate acetyl esters, CE16
PDE_06138	cell wall organization protein, GHNC
PDE_07124	cellobiohydrolase, GH6, CBM1
PDE_05445	cellobiohydrolase, GH7
PDE_07945	cellobiohydrolase, GH7, CBM1
PDE_03310	CenC-like carbohydrate binding domain protein, CBM4/9/16
PDE_02384	CenC-like carbohydrate binding protein, CBM4/9/16
PDE_04189	chitin and peptidoglycan binding protein, CBM18, CBM50
PDE_03292	chitin binding protein with WSC domain, CBM18
PDE_00308	chitin binding protein, CBM33
PDE_09441	chitin binding protein, CBM33
PDE_07861	chitin deacetylase, CE4, CBM18
PDE_00401	chitin glucanosyltransferase, GH16
PDE_05263	chitin glucanosyltransferase, GH16
PDE_01168	chitinase, GH18
PDE_01573	chitinase, GH18
PDE_08122	chitinase, GH18
PDE_09532	chitinase, GH18
PDE_07642	chitinase, GH18, CBM18
PDE_01779	chitinase, GH18, CBM18
PDE_06566	chitinase, GH18, CBM18
PDE_05081	chitinase, GH18, CBM18, CBM50
PDE_01255	chitosanase, GH75
PDE_06026	chitosanase, GH75
PDE_08733	chitosanase, GH75
PDE_03294	cutinase, CE5
PDE_04915	cutinase, CE5
PDE_07475	cutinase, CE5
PDE_04162	endopolygalacturonase, GH28
PDE_07153	endopolygalacturonase, GH28
PDE_02862	endo-β-1,3-glucanase, GH81
PDE_02583	endo-β-1,4-galactanase, GH53
PDE_02886	endo-β-1,4-glucanase, GH12
PDE_06439	endo-β-1,4-glucanase, GH12
PDE_09014	endo-β-1,4-glucanase, GH12
PDE_07928	endo-β-1,4-glucanase, GH45, CBM1
PDE_05193	endo-β-1,4-glucanase, GH5
PDE_00507	endo-β-1,4-glucanase, GH5, CBM1
PDE_03711	endo-β-1,4-glucanase, GH5, CBM1
PDE_09226	endo-β-1,4-glucanase, GH5, CBM1
PDE_09969	endo-β-1,4-glucanase, GH5, CBM1
PDE_00698	endo-β-1,4-glucanase, GH61
PDE_05633	endo-β-1,4-glucanase, GH61
PDE_06768	endo-β-1,4-glucanase, GH61
PDE_01261	endo-β-1,4-glucanase, GH61, CBM1
PDE_07929	endo-β-1,4-glucanase, GH7, CBM1
PDE_00752	endo-β-1,4-xylanase, GH10
PDE_02418	endo-β-1,4-xylanase, GH10
PDE_08094	endo-β-1,4-xylanase, GH10, CBM1
PDE_04478	endo-β-1,4-xylanase, GH11
PDE_05210	endo-β-1,4-xylanase, GH11
PDE_09478	endo-β-1,4-xylanase, GH11
PDE_02101	endo-β-1,4-xylanase, GH11, CBM1
PDE_02682	endo-β-1,4-xylanase, GH11, CBM1
PDE_03573	endo-β-1,4-xylanase, GH30
PDE_00014	endo-β-1,4-xylanase, GH30, CBM1
PDE_06058	endo-β-1,6-galactanase, GH30
PDE_01896	exopolygalacturonase, GH28
PDE_06891	exopolygalacturonase, GH28
PDE_08038	exo-α-L-1,5-arabinanase, GH93
PDE_09333	exo-α-L-1,5-arabinanase, GH93
PDE_09279	exo-β-1,3-galactanase, GH43, CBM35
PDE_03112	exo-β-1,3-glucanase, GH17
PDE_08250	exo-β-1,3-glucanase, GH17
PDE_02800	exo-β-1,3-glucanase, GH5
PDE_00310	exo-β-1,3-glucanase, GH55
PDE_02219	exo-β-1,3-glucanase, GH55
PDE_08139	exo-β-1,3-glucanase, GH55
PDE_01280	exo-β-glucosaminidase, GH2
PDE_08238	feruloyl esterase, CE1
PDE_06649	feruloyl esterase, CE1, CBM1
PDE_05527	glucoamylase, GH15, CBM20
PDE_09417	glucoamylase, GH15, CBM20
PDE_07639	lichenase, GH16
PDE_03296	lysozyme, GH25
PDE_06068	pectate lyase, PL1
PDE_03289	pectin acetylesterase, CE12
PDE_01467	pectin lyase, PL1
PDE_07259	pectin lyase, PL1
PDE_01529	pectin methylesterase, CE8
PDE_01675	pectin methylesterase, CE8
PDE_06124	peptidoglycan binding protein with transglycosylase SLT domain, CBM50
PDE_05249	peptidoglycan binding protein, CBM50
PDE_03905	peptidoglycan binding protein, CBM50
PDE_05657	peptidoglycan binding protein, CBM50
PDE_07894	peptidoglycan binding protein, CBM50
PDE_01775	peptidoglycan N-acetylglucosamine deacetylase, CE4
PDE_04459	polygalacturonase and pectin methylesterase, GH28, CE8
PDE_03218	polygalacturonase, GH28
PDE_07938	polygalacturonase, GH28
PDE_02093	rhamnogalacturonan acetylesterase, CE12
PDE_00004	rhamnogalacturonan lyase, PL4
PDE_01385	rhamnogalacturonan lyase, PL4
PDE_07659	rhamnogalacturonan lyase, PL4
PDE_02689	rhamnogalacturonan α-L-rhamnopyranohydrolase, GH28
PDE_09285	rhamnogalacturonan α-L-rhamnopyranohydrolase, GH28
PDE_03466	rhamnogalacturonase, GH28
PDE_05931	rhamnogalacturonase, GH28
PDE_01354	starch and chitin binding protein, CBM20, CBM33
PDE_00248	SUN domain protein, GHNC
PDE_02102	swollenin, CBM1
PDE_02758	UDP-Xyl: (mannosyl) glucuronoxylomannan/galactoxylomannan β-1,2-xylosyltransferase, GT90
PDE_04409	unknown, GTNC
PDE_01403	α,α-trehalase, GH65
PDE_09877	α-1,2-mannosyltransferase, GT15
PDE_05223	α-1,3-glucanase, GH71
PDE_04381	α-1,3-glucanase, GH71, CBM24
PDE_06330	α-1,3-glucanase, GH71, CBM24
PDE_06621	α-1,3-glucanase, GH71, CBM24
PDE_10011	α-1,3-glucanase, GH71, CBM24
PDE_00600	α-1,6-mannanase, GH76
PDE_01622	α-1,6-mannanase, GH76
PDE_04157	α-1,6-mannosyltransferase, GT32
PDE_09812	α-1,6-mannosyltransferase, GT32
PDE_01201	α-amylase, GH13, CBM20
PDE_02514	α-galactosidase, GH27, CBM1
PDE_00400	α-glucosidase, GH31
PDE_03966	α-glucosidase, GH31
PDE_07013	α-glucuronidase and N-acetyl β-glucosaminidase, GH67, GH84
PDE_01750	α-L-arabinofuranosidase, GH43
PDE_07585	α-L-arabinofuranosidase, GH43
PDE_08972	α-L-arabinofuranosidase, GH43
PDE_09995	α-L-arabinofuranosidase, GH43
PDE_00015	α-L-arabinofuranosidase, GH43, CBM1
PDE_06067	α-L-arabinofuranosidase, GH43, CBM6
PDE_06546	α-L-arabinofuranosidase, GH51, CBM4/9/16
PDE_09988	α-L-arabinofuranosidase, GH54, CBM42
PDE_07897	α-L-arabinofuranosidase, GH62
PDE_00016	α-L-arabinofuranosidase, GH62, CBM1
PDE_02396	α-L-rhamnosidase, GH78
PDE_02688	α-L-rhamnosidase, GH78
PDE_00333	α-mannosidase, GH47
PDE_05852	α-mannosidase, GH47
PDE_00591	α-mannosidase, GH92
PDE_07234	α-mannosidase, GH92
PDE_07276	α-mannosidase, GH92
PDE_08085	α-mannosidase, GH92
PDE_02100	α-N-acetylglucosaminidase, GH89
PDE_02990	β-1,3-1,4-glucanase, GH16
PDE_09918	β-1,3-1,6- / β-1,3-1,4-glucan hydrolase, GH16
PDE_00615	β-1,3-glucanosyltransferase, GH17
PDE_05084	β-1,3-glucanosyltransglycosylase, GH72
PDE_07962	β-1,3-glucanosyltransglycosylase, GH72
PDE_06951	β-1,3-glucanosyltransglycosylase, GH72, CBM43
PDE_03199	β-1,3-mannanase, GH5
PDE_06438	β-1,4-mannanase, GH26, CBM1
PDE_06023	β-1,4-mannanase, GH5, CBM1
PDE_02004	β-1,6-glucanase, GH30
PDE_04310	β-1,6-glucanase, GH5
PDE_06511	β-1,6-N-acetylglucosaminidase, GH20
PDE_06156	β-fructofuranosidase, GH32, CBM38
PDE_00076	β-galactosidase, GH35
PDE_00282	β-galactosidase, GH35
PDE_02532	β-galactosidase, GH35
PDE_06631	β-glucanase, GH16
PDE_01277	β-glucosidase, GH1
PDE_02736	β-glucosidase, GH3
PDE_02905	β-glucosidase, GH3
PDE_09019	β-glucosidase, GH3
PDE_02801	β-glucuronidase, GH2
PDE_01949	β-glucuronidase, GH79
PDE_08804	β-mannosidase, GH2
PDE_06400	β-N-acetylhexosaminidase, GH3
PDE_00049	β-xylosidase, GH3
PDE_08037	β-xylosidase, GH3
PDE_09710	β-xylosidase, GH3
Peptidases
PDE_01021	aspartic peptidase
PDE_04768	aspartic peptidase
PDE_07344	aspartic peptidase
PDE_07724	aspartic peptidase
PDE_07927	aspartic peptidase
PDE_07930	aspartic peptidase
PDE_00462	cysteine peptidase
PDE_00876	cysteine peptidase
PDE_06014	glutamic peptidase
PDE_07933	glutamic peptidase
PDE_01797	metallo peptidase
PDE_02146	metallo peptidase
PDE_02342	metallo peptidase
PDE_02549	metallo peptidase
PDE_04431	metallo peptidase
PDE_05587	metallo peptidase
PDE_05727	metallo peptidase
PDE_07936	metallo peptidase
PDE_00005	serine peptidase
PDE_00437	serine peptidase
PDE_00949	serine peptidase
PDE_00963	serine peptidase
PDE_01169	serine peptidase
PDE_01200	serine peptidase
PDE_01282	serine peptidase
PDE_01353	serine peptidase
PDE_01866	serine peptidase
PDE_01983	serine peptidase
PDE_02033	serine peptidase
PDE_02789	serine peptidase
PDE_03259	serine peptidase
PDE_03636	serine peptidase
PDE_03650	serine peptidase
PDE_03702	serine peptidase
PDE_04195	serine peptidase
PDE_04925	serine peptidase
PDE_05103	serine peptidase
PDE_05305	serine peptidase
PDE_05692	serine peptidase
PDE_06031	serine peptidase
PDE_08082	serine peptidase
PDE_08101	serine peptidase
PDE_09313	serine peptidase
PDE_09907	serine peptidase
PDE_00595	threonine peptidase
Proteins of other functions
PDE_00013	6-hydroxy-D-nicotine oxidase
PDE_00809	6-hydroxy-D-nicotine oxidase
PDE_01783	6-hydroxy-D-nicotine oxidase
PDE_04540	6-hydroxy-D-nicotine oxidase
PDE_05973	6-hydroxy-D-nicotine oxidase
PDE_07606	6-hydroxy-D-nicotine oxidase
PDE_08180	6-hydroxy-D-nicotine oxidase
PDE_08764	6-hydroxy-D-nicotine oxidase
PDE_09212	6-hydroxy-D-nicotine oxidase
PDE_01315	acid phosphatase
PDE_01372	acid phosphatase
PDE_03399	acid phosphatase
PDE_04316	acid phosphatase
PDE_06737	acid phosphatase
PDE_06814	acid phosphatase
PDE_08599	acid phosphatase
PDE_08678	acid phosphatase
PDE_02797	acid phosphatase
PDE_06652	acid phosphatase
PDE_07361	agmatinase
PDE_05097	aldose 1-epimerase
PDE_04147	alkaline phosphatase
PDE_01415	allergen
PDE_02099	allergen
PDE_03255	allergen
PDE_04949	allergen
PDE_05339	allergen
PDE_06125	allergen
PDE_07261	amidase
PDE_04283	antifungal protein
PDE_09040	blastomyces yeast phase-specific protein
PDE_01404	catalase
PDE_09177	cellobiose dehydrogenase
PDE_08075	CFEM domain protein
PDE_01567	choline dehydrogenase
PDE_04270	choline dehydrogenase
PDE_04088	clock-controlled protein
PDE_02114	cytochrome P450
PDE_05886	cytochrome P450
PDE_09458	cytochrome P450
PDE_03148	D-amino-acid oxidase
PDE_03474	dioxygenase
PDE_00613	endosomal cargo receptor
PDE_09747	FAD-linked oxidoreductase
PDE_08709	feruloyl esterase
PDE_09178	feruloyl esterase
PDE_01888	fibronectin type III domain-containing protein
PDE_07934	flavin containing amine oxidoreductase
PDE_01765	gluconolactonase
PDE_01413	glucose oxidase
PDE_01798	glutaminase
PDE_04513	glutaminase
PDE_07857	GMC oxidoreductase
PDE_06055	guanyl-specific ribonuclease
PDE_07705	heterokaryon incompatibility Het-C
PDE_05824	heterokaryon incompatibility protein Het-C
PDE_09715	hydrophobin
PDE_09832	hydrophobin
PDE_03484	IgE-binding protein
PDE_09453	iron transport multicopper oxidase
PDE_09492	iron transport multicopper oxidase, laccase
PDE_00453	laccase
PDE_02128	L-ascorbate oxidase
PDE_08957	lipase
PDE_04294	lipase
PDE_00704	mannosylphosphate transferase
PDE_00500	non-hemolytic phospholipase C precursor
PDE_05941	nuclease
PDE_01956	NUDIX domain protein
PDE_06389	oxalate decarboxylase
PDE_06501	oxidoreductin
PDE_02052	palmitoyl-protein thioesterase
PDE_02370	peptidase inhibitor
PDE_09414	peroxidase
PDE_04273	peroxygenase
PDE_06340	phosphatidylglycerol specific phospholipase C
PDE_03110	phosphatidylglycerol/phosphatidylinositol transfer protein
PDE_06403	phosphoesterase
PDE_07200	phosphoglycerate mutase
PDE_01335	phosphoglycerate mutase family protein
PDE_04681	phospholipase C
PDE_04356	phytase
PDE_02459	PI-PLC X domain-containing protein
PDE_07033	PI-PLC X domain-containing protein
PDE_03481	polyamine oxidase
PDE_04950	prenylcysteine oxidase
PDE_06075	purine nucleoside permease
PDE_01330	ribonuclease T1
PDE_00092	ribonuclease T2
PDE_00021	Rodlet protein
PDE_02190	rot1
PDE_01681	salicylate hydroxylase
PDE_01445	Ser/Thr protein phosphatase
PDE_06611	serine/threonine kinase
PDE_00482	soluble epoxide hydrolase
PDE_06122	sphingomyelin phosphodiesterase
PDE_08598	sphingomyelin phosphodiesterase
PDE_07437	stress response protein Rds1
PDE_04723	stress-responsive nuclear envelope protein
PDE_02049	tannase
PDE_01376	thaumatin-like pathogenesis-related protein
PDE_09714	thioredoxin
PDE_06625	thioredoxin reductase
PDE_01393	transglycosylase
PDE_02515	triacylglycerol lipase
PDE_04222	triacylglycerol lipase
PDE_06813	triacylglycerol lipase
PDE_09947	triacylglycerol lipase
PDE_04505	tyrosinase
PDE_06164	vacuolar protein sorting-associated protein
PDE_01802	vacuolar protein sorting-associated protein
PDE_09865	WSC domain protein
PDE_01796	WSC domain protein
Proteins of unkonwn function
PDE_00216	hypothetical protein
PDE_00272	hypothetical protein
PDE_00287	hypothetical protein
PDE_00348	hypothetical protein
PDE_00395	hypothetical protein
PDE_00414	hypothetical protein
PDE_00503	hypothetical protein
PDE_00508	hypothetical protein
PDE_00612	hypothetical protein
PDE_00653	hypothetical protein
PDE_00663	hypothetical protein
PDE_00667	hypothetical protein
PDE_00707	hypothetical protein
PDE_01055	hypothetical protein
PDE_01113	hypothetical protein
PDE_01252	hypothetical protein
PDE_01260	hypothetical protein
PDE_01274	hypothetical protein
PDE_01346	hypothetical protein
PDE_01349	hypothetical protein
PDE_01362	hypothetical protein
PDE_01416	hypothetical protein
PDE_01664	hypothetical protein
PDE_01708	hypothetical protein
PDE_01724	hypothetical protein
PDE_01737	hypothetical protein
PDE_01767	hypothetical protein
PDE_01863	hypothetical protein
PDE_01971	hypothetical protein
PDE_01995	hypothetical protein
PDE_02068	hypothetical protein
PDE_02125	hypothetical protein
PDE_02140	hypothetical protein
PDE_02180	hypothetical protein
PDE_02220	hypothetical protein
PDE_02222	hypothetical protein
PDE_02223	hypothetical protein
PDE_02422	hypothetical protein
PDE_02559	hypothetical protein
PDE_02721	hypothetical protein
PDE_02854	hypothetical protein
PDE_03152	hypothetical protein
PDE_03193	hypothetical protein
PDE_03295	hypothetical protein
PDE_03308	hypothetical protein
PDE_03320	hypothetical protein
PDE_03388	hypothetical protein
PDE_03435	hypothetical protein
PDE_03654	hypothetical protein
PDE_03698	hypothetical protein
PDE_03933	hypothetical protein
PDE_03934	hypothetical protein
PDE_04029	hypothetical protein
PDE_04034	hypothetical protein
PDE_04087	hypothetical protein
PDE_04119	hypothetical protein
PDE_04128	hypothetical protein
PDE_04149	hypothetical protein
PDE_04248	hypothetical protein
PDE_04286	hypothetical protein
PDE_04383	hypothetical protein
PDE_04445	hypothetical protein
PDE_04463	hypothetical protein
PDE_04474	hypothetical protein
PDE_04506	hypothetical protein
PDE_04519	hypothetical protein
PDE_04612	hypothetical protein
PDE_04655	hypothetical protein
PDE_04665	hypothetical protein
PDE_04682	hypothetical protein
PDE_04708	hypothetical protein
PDE_04740	hypothetical protein
PDE_04830	hypothetical protein
PDE_04913	hypothetical protein
PDE_04921	hypothetical protein
PDE_04969	hypothetical protein
PDE_04985	hypothetical protein
PDE_05018	hypothetical protein
PDE_05034	hypothetical protein
PDE_05206	hypothetical protein
PDE_05323	hypothetical protein
PDE_05383	hypothetical protein
PDE_05502	hypothetical protein
PDE_05670	hypothetical protein
PDE_05758	hypothetical protein
PDE_05782	hypothetical protein
PDE_06034	hypothetical protein
PDE_06035	hypothetical protein
PDE_06089	hypothetical protein
PDE_06114	hypothetical protein
PDE_06126	hypothetical protein
PDE_06210	hypothetical protein
PDE_06425	hypothetical protein
PDE_06442	hypothetical protein
PDE_06466	hypothetical protein
PDE_06527	hypothetical protein
PDE_06579	hypothetical protein
PDE_06585	hypothetical protein
PDE_06643	hypothetical protein
PDE_06646	hypothetical protein
PDE_06677	hypothetical protein
PDE_06734	hypothetical protein
PDE_06770	hypothetical protein
PDE_06797	hypothetical protein
PDE_06912	hypothetical protein
PDE_07011	hypothetical protein
PDE_07019	hypothetical protein
PDE_07041	hypothetical protein
PDE_07056	hypothetical protein
PDE_07084	hypothetical protein
PDE_07091	hypothetical protein
PDE_07106	hypothetical protein
PDE_07113	hypothetical protein
PDE_07147	hypothetical protein
PDE_07212	hypothetical protein
PDE_07258	hypothetical protein
PDE_07267	hypothetical protein
PDE_07527	hypothetical protein
PDE_07608	hypothetical protein
PDE_07655	hypothetical protein
PDE_07739	hypothetical protein
PDE_07803	hypothetical protein
PDE_07837	hypothetical protein
PDE_08314	hypothetical protein
PDE_08382	hypothetical protein
PDE_08688	hypothetical protein
PDE_08773	hypothetical protein
PDE_09126	hypothetical protein
PDE_09137	hypothetical protein
PDE_09289	hypothetical protein
PDE_09474	hypothetical protein
PDE_09537	hypothetical protein
PDE_09557	hypothetical protein
PDE_09780	hypothetical protein
PDE_09839	hypothetical protein
PDE_09854	hypothetical protein
PDE_09950	hypothetical protein
PDE_09959	hypothetical protein
PDE_10012	hypothetical protein
PDE_02145	hypothetical protein
PDE_00116	hypothetical protein
PDE_00213	hypothetical protein
PDE_00621	hypothetical protein
PDE_00886	hypothetical protein
PDE_00924	hypothetical protein
PDE_00925	hypothetical protein
PDE_01114	hypothetical protein
PDE_01341	hypothetical protein
PDE_01408	hypothetical protein
PDE_01889	hypothetical protein
PDE_02147	hypothetical protein
PDE_02234	hypothetical protein
PDE_02469	hypothetical protein
PDE_02536	hypothetical protein
PDE_02637	hypothetical protein
PDE_02805	hypothetical protein
PDE_03044	hypothetical protein
PDE_03340	hypothetical protein
PDE_03437	hypothetical protein
PDE_03832	hypothetical protein
PDE_03882	hypothetical protein
PDE_04223	hypothetical protein
PDE_04403	hypothetical protein
PDE_04663	hypothetical protein
PDE_05065	hypothetical protein
PDE_05082	hypothetical protein
PDE_05404	hypothetical protein
PDE_05471	hypothetical protein
PDE_05809	hypothetical protein
PDE_05949	hypothetical protein
PDE_06128	hypothetical protein
PDE_06325	hypothetical protein
PDE_06341	hypothetical protein
PDE_06378	hypothetical protein
PDE_06993	hypothetical protein
PDE_07252	hypothetical protein
PDE_07453	hypothetical protein
PDE_07572	hypothetical protein
PDE_07911	hypothetical protein
PDE_08499	hypothetical protein
PDE_09598	hypothetical protein
PDE_09643	hypothetical protein
PDE_01851	hypothetical protein
